# Supplementary material
Source: publisher site journal article supplement (https://www.spandidos-publications.com/2682/downloadSupplementary)
Supplement: Supplementary file 1 [file downloadSupplementary]

## Sheet: 工作表1
Table SIII: Degree value of nodes in the PPI network.
Gene	Degree
ABCC3	2
ADAM8	15
ADPGK	1
ALDH3B1	11
ANPEP	9
ANXA11	5
ANXA2	26
APOBEC3C	1
APOBEC3G	5
AQP9	12
ARAP1	3
ARHGAP4	6
ARHGEF9	5
ARPC1B	13
ASCL1	3
ASF1A	2
BACE2	1
BATF	6
BCAN	5
BCL2A1	20
BCL3	11
BCL7A	2
BIN2	14
BIRC3	20
C1R	6
C1RL	2
C1S	8
C2	5
C2CD2	1
C5AR1	27
CAMSAP2	2
CAPG	6
CAPZA1	7
CARD9	10
CASK	3
CASP1	40
CASP4	10
CASP8	34
CAST	5
CCL5	42
CCR1	34
CCR5	39
CD163	28
CD4	23
CD44	46
CD68	35
CDCP1	4
CDK5R1	3
CEBPB	9
CFB	7
CIDEB	7
CLASP2	4
CLCF1	1
CLEC7A	25
CLIC1	2
COL5A1	11
COL6A3	7
CORO1B	1
CRB1	1
CRMP1	3
CSF2RB	34
CSPG5	2
CSTA	5
CTSA	15
CTSB	22
CTSC	16
CTSD	19
CTSZ	17
CUL3	7
CYBB	47
CYP1B1	4
CYTH4	15
CYTIP	14
DAB2	4
DENND3	2
DLL3	2
DNASE1L1	5
DOCK2	26
DPF1	1
DRAM1	1
DSE	2
ECSIT	2
EHBP1L1	4
ELF4	2
F13A1	11
FAH	2
FBP1	3
FCGR2A	39
FCGR2B	36
FES	10
FGR	41
FHOD1	4
FKBP11	2
FKBP15	4
FMNL1	7
FNDC3B	1
FSD1	1
FUCA1	15
FXYD5	1
FXYD6	1
GMIP	3
GNA15	4
GNG4	11
GPSM2	6
GPSM3	7
GRN	19
GSTA4	2
GUSB	17
HEXA	9
HEXB	13
HK3	19
HMGCR	2
ICAM1	44
ICAM3	10
IER3	6
IFI30	10
IFITM2	2
IFITM3	4
IKBKE	5
IL10RA	44
IL15	30
IL15RA	7
IL1R1	22
IL21R	13
IL2RB	30
IL4R	17
IL6R	20
IL7R	21
IQGAP1	15
ISG20	5
ITGA5	16
ITGAM	68
ITGB2	65
KDM1A	5
KIF2A	5
KIF3A	5
KLHL23	1
LAIR1	13
LCP1	19
LGALS3	20
LGALS9	11
LHFPL2	2
LIF	15
LILRB1	8
LILRB2	35
LILRB3	9
LMNA	7
LPXN	5
LRRFIP1	2
LTBP2	4
LTBR	5
LY96	15
MAN1A1	4
MAN2A1	5
MAN2B1	14
MANBA	10
MAP2	3
MAP3K8	3
MARCKSL1	2
MGAT1	3
MMP14	11
MMP19	2
MRC2	4
MVP	1
MYH9	13
MYO1C	10
MYO1E	10
MYO1F	18
MYOF	4
NAGA	6
NBEA	1
NCF2	28
NCF4	26
NCKAP1L	19
NOD1	15
NOD2	33
NOL4	1
NPC2	15
NRP1	8
NRXN1	3
OLIG2	7
P4HA2	2
PAFAH1B3	1
PIK3CD	14
PJA1	5
PLAUR	20
PLCG2	16
PLEK	43
PLEKHO2	2
PLK3	3
PLXND1	4
PODXL2	1
PRF1	26
PRKCD	26
PRPSAP2	1
PRR13	1
PSAT1	1
PTGER4	5
PTPN6	27
PTRF	3
PYCARD	22
RAB20	1
RAB27A	10
RAC2	39
RAD21	4
RBM47	1
RHBDF2	5
RHOG	15
RRAS	9
S100A11	5
S100A4	8
S100A8	17
S100A9	19
SASH3	15
SCG3	2
SERPINA1	15
SERPINB1	2
SHC1	23
SIAH1	5
SIGLEC7	10
SIL1	3
SIPA1	1
SLAMF8	4
SLC11A1	18
SLC15A3	7
SLC7A7	4
SP100	6
SPAST	1
SRPK2	4
STAB1	9
STAT5A	28
STAT6	21
STXBP2	5
SYK	44
SYNPO	2
TAPBP	1
TGFBI	9
THBD	7
THEMIS2	8
TIMP1	24
TLR2	58
TMBIM1	10
TNFAIP2	6
TNFAIP3	22
TNFAIP8	3
TNFRSF14	7
TNFRSF1A	30
TNFRSF1B	37
TNFSF13	4
TOP2B	4
TOR4A	3
TRADD	9
TREM1	22
TRIM37	5
TRIM38	4
TYMP	2
UBA7	7
UBE2E3	7
VAMP8	21
VASP	7
VAV1	28
VDR	4
VEZF1	1
WAS	30
WASF1	10
WIPF1	9
WIPI1	1
YWHAQ	7
ZC3H12A	4
ZFP37	2
ZNF710	1
ZNF821	1
